# Supplementary material for: Cancer Screening among Rural People Who Use Drugs: Colliding Risks and Barriers
Source: MDPI journal article supplement (doi:10.3390/ijerph19084555), 2022-04-10
Supplement: s1 [file s1]

## **SURVEY INSTRUMENT**

### **A. Demographic Information**

1. What is your age?
2. What is your gender (at birth)?  
Male      Female      Other
3. What is your sexual orientation/ gender identity? Do you consider yourself to be:
  - a. Heterosexual/Straight
  - b. Lesbian or gay
  - c. Bisexual
  - d. Other
  - e. Don't know/ Not sure
4. Which of the following would you self-identify as your race?
  - a. Black or African American
  - b. White
  - c. Hispanic
  - d. Asian
  - e. Other
5. What county are you from?
6. What is your current relationship status?
  - a. Never married
  - b. Divorced
  - c. Widowed
  - d. Separated
  - e. Married
  - f. Co-habiting/living together
7. What is your household income?
  - a. Less than \$25,000
  - b. \$25,000 to \$34,999
  - c. \$35,000 to \$49,999
  - d. \$50,000 to \$74,999
  - e. \$75,000 to \$99,999
  - f. \$100,000 or more
8. What is the highest grade or year of school you completed?
  - a. Never attended school or only kindergarten
  - b. Elementary
  - c. Some high school

- d. High school graduate
- e. Some college or technical school
- f. College graduate or more

9. How much do you weigh without shoes?

\_\_\_ lbs

10. How tall are you without shoes?

\_\_\_ ft \_\_\_ in

11. During the past 30 days, on the days when you drank, about how many drinks did you drink on the average?

\_\_\_ Number of alcoholic beverage

12. During the past 30 days, how many days per week did you have at least one drink of any alcoholic beverage?

\_\_\_ Number of days

13. In a typical week, how many days do you do any physical activity or exercise of at least moderate intensity?

- a. None
- b. \_\_\_ Number of days per week
- c. Don't know/Not sure

14. During the past month, did you participate in any physical activities or exercises such as running, yoga, golf, gardening, or walking for exercise?

- a. No
- b. Yes
- c. Don't know/not sure

15. Do you now, or have you in the past, smoked cigarettes?

Yes                      No

16. If 'yes', for how many years did you/have you smoked?

## **B. How Drug Use Might Have Impacted Your Medical Care**

17. Do you currently see a primary care provider on a regular or routine basis? (This might be for annual exams, flu vaccinations, etc.)?

Yes                      No

18. If you have a primary care provider, how long have you been going to this provider? (select only one response)

- a. Less than 6 months
- b. At least 6 months but less than 1 year
- c. At least 1 year but less than 3 years
- d. At least 3 years but less than 5 years
- e. 5 years or more

19. Have you ever avoided health care because of your drug use?

Yes                      No

20. Have you ever had a healthcare worker refuse to treat you or denied you access to medical treatment or care because of your drug use?

Yes                      No                      N/A – never accessed healthcare

21. Do you feel ‘accepted’ and “non-judged’ during office visits?

- a. Yes, and they know about the drug use
- b. Yes, but they don’t know about the drug use
- c. No, they treat me differently

22. Have you had bad experiences with primary care such that you considered not going anymore?

Yes                      No

### C. Questions about Cancer Screening Knowledge

Screening refers to quick tests to see if you might have a specific disease, such as cancer. Unfortunately, there are only a couple cancers for which there is a good screening test.

23. Please check if you think there is, or is not, a screening test for each of the following cancers.

|              | Yes   | No    |
|--------------|-------|-------|
| - breast     | _____ | _____ |
| - stomach    | _____ | _____ |
| - cervical   | _____ | _____ |
| - brain      | _____ | _____ |
| - liver      | _____ | _____ |
| - lung       | _____ | _____ |
| - kidney     | _____ | _____ |
| - colorectal | _____ | _____ |
| - eye        | _____ | _____ |

### D. Questions about Cancer Screening Recommendations

8. Has a doctor, nurse, or other health professional ever recommended that you be screened for breast cancer by any of the following?

|               | Yes   | No    |
|---------------|-------|-------|
| - mammography | _____ | _____ |
| - breast MRI  | _____ | _____ |

9. Has a doctor, nurse, or other health professional ever recommended that you be screened for cervical cancer by any of the following?

10. Has a doctor, nurse, or other health professional ever recommended that you be screened for colorectal cancer by any of the following?

11. Has a doctor, nurse, or other health professional ever recommended that you be screened for lung cancer?

### **E. Questions about Cancer Screening Utilization**

[illegible]

☐ I didn't have insurance  
☐ I didn't think I could afford it  
☐ I didn't have a way to get to the screening location (no transportation)  
☐ I couldn't get an appointment  
☐ I couldn't find the right doctor  
☐ I was embarrassed to discuss or go through with it  
☐ I didn't want to know

- ☐ I didn't think I was at risk
- ☐ I didn't have any symptoms
- ☐ I don't have a family history
- ☐ I thought the test might be difficult
- ☐ I thought the test might be painful
- ☐ I was afraid I'd be judged or disrespected during the visit

**F. Questions about Cancer History**

14. Have you ever told from health care providers that you have a cancer?

Yes                      No                      Don't know / Not sure

15. Has a parent, sibling or child related to you by blood ever been diagnosed with cancer? *Include only siblings with same biological mother and father.*

Yes                      No                      Don't know / Not sure

## **INTERVIEW GUIDE**

### **PWUD/Cancer Screening Preliminary Interviews – PWUD**

Note to Interviewer: After going through informed consent process, provide participant with incentive.

After consent, turn on the recorder and say:

“Today is [date]. This is an interview with [interview code number]. Before we start the interview, I’d like to say that I am recording you, and ask if you give me your permission to record you.”

### **Introduction**

Interviewer Script: I want to thank you for talking with me today. We are interested in learning more about what people in the area know about cancer screenings and adherence to cancer screening recommendations. I want to remind you that everything you say is confidential. We will not share your name with anyone other than study staff.

This interview is completely voluntary. If you are uncomfortable with any question, and do not want to answer, please let me know and we can skip it.

Do you have any questions before we begin?

[Take time to answer questions if necessary.]

---

Interviewer Script: I’d like to start by asking you about cancer screening guidelines. Cancer screening increases the chances of detecting certain cancers early, when they might be easier to treat. Screening guidelines help us know when to start screening and how often to do screening. Recommendations vary by age, sex, etc.

1. Can you tell me what you know about the types of cancer screenings you should do?
  - a. Probe: When should you start colonoscopy, mammography, pap test, etc.? (list gender-specific screenings)
  - b. Probe: How often do you need to get colonoscopy, mammography, pap test, etc.? (list gender-specific screenings)
  - c. Prompt: How/where did you learn about these guidelines?
  - d. Prompt: What about for other people? What types of screening should they get and when?
2. Have you ever been told that you needed a certain screening test?
  - a. Prompt: Colonoscopy, mammogram, pap smear, colonoscopy, stool (fecal) test, low-dose computed tomography (LDCT).

- b. If yes to any: What happened? Did you go for the screening? What was your experience doing this?
  - c. If no to any (gender-specific): Why do you think your providers haven't told you to get screening?
- 3. Can you tell me about any barriers you face getting recommended cancer screenings?
  - a. Probe: What has been your experience getting medical care?
    - i. Probe: Does drug use come up?
    - ii. Probe for stigma.
  - b. Probe: Do you have insurance?
  - c. Probe: If you had a medical appointment, how would you get there?
  - d. Probe: How often do you have appointments that are scheduled a few weeks or months away? Is it easy for you to make it to these appointments?
- 4. What would make you feel more supported and better able to access recommended cancer screenings?
  - a. Probe: Standard office visits vs. mobile/off-clinic visits.
